# Supplementary material for: Transcriptome analysis of microRNAs in developing cerebral cortex of rat
Source: PubMed Central journal article supplement (PMC3441217; doi:10.1186/1471-2164-13-232), 2012-06-12

**A**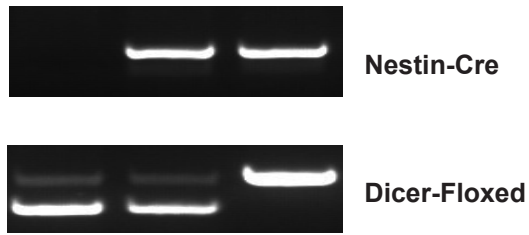**B**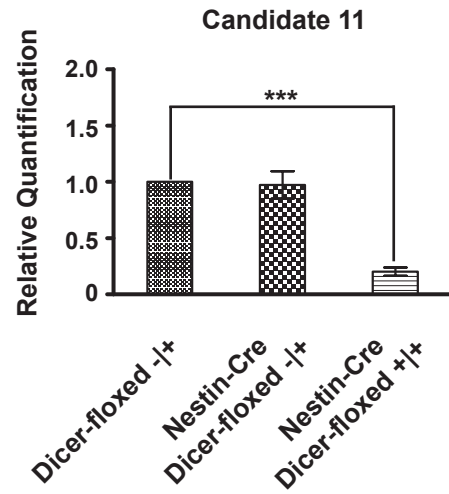**C**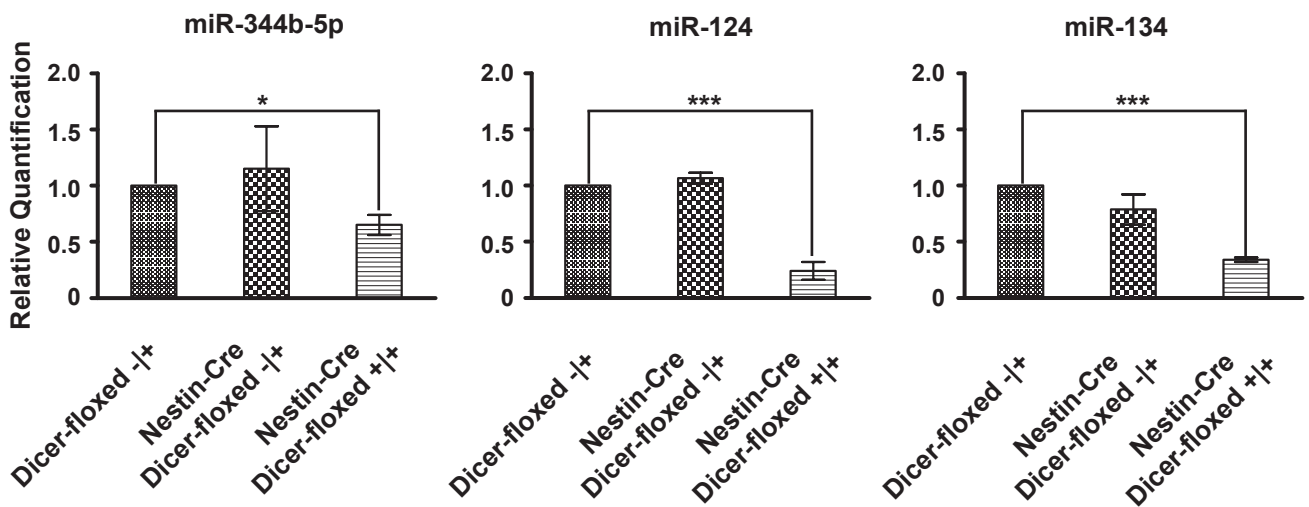

Supplement: 1471-2164-13-232-S6.pdf [file 1471-2164-13-232-S6.pdf]
