# Supplementary material for: Transcriptome analysis of microRNAs in developing cerebral cortex of rat
Source: PubMed Central journal article supplement (PMC3441217; doi:10.1186/1471-2164-13-232), 2012-06-12
Supplement: 1471-2164-13-232-S7.pdf [file 1471-2164-13-232-S7.pdf]

**A**

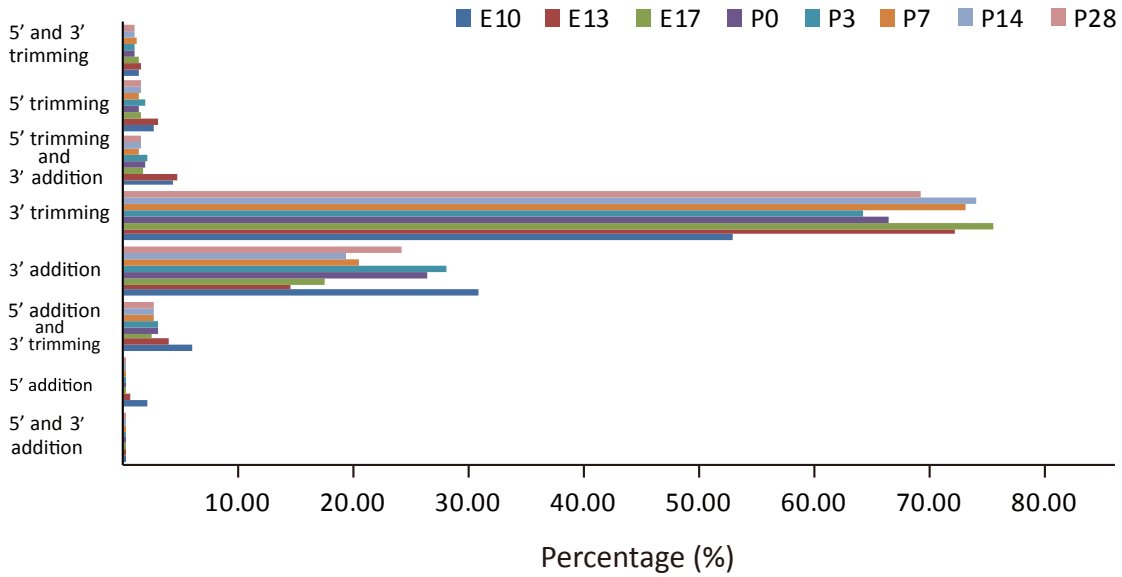

**B**

| Type of isomiR              | Sequence                            | Length | Counts |
|-----------------------------|-------------------------------------|--------|--------|
| pre-miR-128                 | ATTTCACAGTGAACCGGTCTCTTTTCAG        |        |        |
| miR-128                     | ..... TCACAGTGAACCGGTCTCTTT.....    | 21     | 771473 |
| 5' addition                 | ..... TCTCACAGTGAACCGGTCTCTTT.....  | 24     | 8      |
| and                         | ..... CTCACAGTGAACCGGTCTCTTT.....   | 23     | 428    |
| 3' addition                 | ..... CTCACAGTGAACCGGTCTCTTT.....   | 24     | 28     |
| 5' addition                 | ..... CTCACAGTGAACCGGTCTCTTT.....   | 22     | 968    |
|                             | ..... TCTCACAGTGAACCGGTCTCTTT.....  | 23     | 17     |
| 5' addition and 3' trimming | ..... TCTCACAGTGAACCGGTCTC.....     | 20     | 3      |
|                             | ..... TCTCACAGTGAACCGGTCTCT.....    | 21     | 2      |
|                             | ..... TCTCACAGTGAACCGGTCTC.....     | 18     | 1      |
|                             | ..... CTCACAGTGAACCGGTCTCT.....     | 21     | 132    |
|                             | ..... CTCACAGTGAACCGGTCTCT.....     | 20     | 101    |
|                             | ..... CTCACAGTGAACCGGTCTC.....      | 19     | 100    |
|                             | ..... CTCACAGTGAACCGGTCT.....       | 18     | 75     |
| 5' trimming                 | ..... ACAGTGAACCGGTCTCTTT.....      | 19     | 8684   |
|                             | ..... CACAGTGAACCGGTCTCTTT.....     | 20     | 3091   |
|                             | ..... CAGTGAACCGGTCTCTTT.....       | 18     | 25     |
| 5' trimming and 3' addition | ..... CACAGTGAACCGGTCTCTTT.....     | 21     | 1465   |
|                             | ..... ACAGTGAACCGGTCTCTTT.....      | 20     | 4260   |
|                             | ..... CACAGTGAACCGGTCTCTTT.....     | 22     | 221    |
|                             | ..... ACAGTGAACCGGTCTCTTT.....      | 21     | 282    |
|                             | ..... ACAGTGAACCGGTCTCTTTTC.....    | 22     | 4      |
|                             | ..... CAGTGAACCGGTCTCTTT.....       | 19     | 12     |
|                             | ..... CAGTGAACCGGTCTCTTT.....       | 20     | 1      |
|                             | ..... AGTGAACCGGTCTCTTT.....        | 18     | 16     |
|                             | ..... AGTGAACCGGTCTCTTTTCA.....     | 21     | 4      |
| 5' and 3' trimming          | ..... AGTGAACCGGTCTCTTT.....        | 19     | 2      |
|                             | ..... ACAGTGAACCGGTCTCTTT.....      | 18     | 1577   |
|                             | ..... CACAGTGAACCGGTCTCT.....       | 18     | 446    |
|                             | ..... CACAGTGAACCGGTCTCTTT.....     | 19     | 472    |
| 3' addition                 | ..... TCACAGTGAACCGGTCTCTTT.....    | 22     | 355613 |
|                             | ..... TCACAGTGAACCGGTCTCTTT.....    | 23     | 21175  |
|                             | ..... TCACAGTGAACCGGTCTCTTTTC.....  | 24     | 45     |
|                             | ..... TCACAGTGAACCGGTCTCTTTTCA..... | 25     | 2      |
| 3' trimming                 | ..... TCACAGTGAACCGGTCTCT.....      | 19     | 100584 |
|                             | ..... TCACAGTGAACCGGTCTCTTT.....    | 20     | 115538 |
|                             | ..... TCACAGTGAACCGGTCTC.....       | 18     | 72211  |
