# Supplementary material for: Transcriptome analysis of microRNAs in developing cerebral cortex of rat
Source: PubMed Central journal article supplement (PMC3441217; doi:10.1186/1471-2164-13-232), 2012-06-12
Supplement: 1471-2164-13-232-S8.pdf [file 1471-2164-13-232-S8.pdf]

| Edited position  | sequence           | E10         | E13         | E17          | P0           | P3            | P7            | P14           | P28           |
|------------------|--------------------|-------------|-------------|--------------|--------------|---------------|---------------|---------------|---------------|
| <b>Wild type</b> | <b>TCACAGTG</b>    | <b>1454</b> | <b>4553</b> | <b>20503</b> | <b>56260</b> | <b>100878</b> | <b>143098</b> | <b>164443</b> | <b>135771</b> |
| C / A ; 2        | T <b>A</b> CAGTG   | 0.00        | 0.00        | 8.00         | 15.63        | 4.26          | 82.31         | 55.74         | 58.31         |
| C / T ; 2        | T <b>T</b> CAGTG   | 0.00        | 0.00        | 9.09         | 24.44        | 23.47         | 91.15         | 62.88         | 66.85         |
| C / G ; 2        | T <b>G</b> CAGTG   | 0.00        | 0.00        | 0.00         | 0.00         | 4.89          | 30.58         | 0.00          | 15.13         |
| A / T ; 3        | TC <b>T</b> CAGTG  | 0.00        | 0.00        | 4.49         | 9.02         | 9.44          | 73.03         | 58.64         | 34.85         |
| A / C ; 3        | TC <b>C</b> CAGTG  | 0.00        | 0.00        | 3.41         | 19.54        | 36.45         | 105.04        | 466.40        | 24.87         |
| A / G ; 3        | TC <b>G</b> CAGTG  | 0.00        | 0.00        | 6.30         | 17.96        | 26.52         | 95.35         | 80.67         | 74.28         |
| C / A ; 4        | TC <b>A</b> AGTG   | 0.00        | 0.00        | 2.16         | 11.05        | 3.74          | 25.45         | 18.08         | 111.82        |
| C / T ; 4        | TC <b>A</b> TAGTG  | 0.00        | 3.14        | 15.23        | 45.97        | 52.63         | 134.13        | 93.91         | 306.37        |
| C / G ; 4        | TC <b>A</b> GAGTG  | 0.00        | 0.00        | 0.00         | 16.59        | 5.13          | 22.66         | 20.46         | 202.16        |
| A / T ; 5        | TCAC <b>T</b> GTG  | 0.00        | 0.00        | 2.54         | 8.79         | 4.05          | 37.87         | 77.04         | 38.30         |
| A / C ; 5        | TCAC <b>C</b> G TG | 0.00        | 0.00        | 0.00         | 8.32         | 25.89         | 12.45         | 370.24        | 13.16         |
| A / G ; 5        | TCAC <b>G</b> G TG | 0.00        | 0.00        | 6.54         | 13.80        | 14.85         | 57.78         | 95.27         | 57.96         |
| G / A ; 6        | TCAC <b>A</b> ATG  | 0.00        | 0.00        | 5.14         | 14.72        | 13.37         | 68.97         | 107.54        | 67.14         |
| G / T ; 6        | TCAC <b>A</b> TTG  | 2.62        | 0.00        | 17.04        | 75.82        | 88.45         | 349.73        | 645.63        | 126.26        |
| G / C ; 6        | TCAC <b>A</b> CTG  | 0.00        | 0.00        | 0.00         | 5.71         | 11.50         | 38.18         | 193.27        | 19.81         |
| T / A ; 7        | TCACAG <b>A</b> G  | 0.00        | 0.00        | 12.09        | 24.16        | 15.08         | 88.63         | 125.20        | 77.27         |
| T / C ; 7        | TCACAG <b>C</b> G  | 0.00        | 3.30        | 12.26        | 24.67        | 35.93         | 79.91         | 178.76        | 81.30         |
| T / G ; 7        | TCACAG <b>G</b> G  | 0.00        | 0.00        | 6.35         | 24.83        | 17.91         | 81.30         | 120.25        | 23.36         |
| G / A ; 8        | TCACAG <b>T</b> A  | 0.00        | 0.00        | 8.86         | 25.86        | 52.38         | 73.14         | 77.01         | 91.50         |
| G / T ; 8        | TCACAG <b>T</b> T  | 0.00        | 4.89        | 78.96        | 148.27       | 500.88        | 175.12        | 191.03        | 292.27        |
| G / C ; 8        | TCACAG <b>C</b> T  | 0.00        | 0.00        | 7.22         | 28.37        | 113.11        | 30.30         | 313.34        | 38.19         |
| <b>Wild type</b> | <b>CGGTCTCTT</b>   | <b>1454</b> | <b>4553</b> | <b>20503</b> | <b>56260</b> | <b>100878</b> | <b>143098</b> | <b>164443</b> | <b>135771</b> |
| C / A ; 11       | <b>A</b> GGTCTCTT  | 0.00        | 0.00        | 2.33         | 3.90         | 2.42          | 0.00          | 0.00          | 0.00          |
| C / G ; 11       | <b>G</b> GGTCTCTT  | 0.00        | 0.00        | 0.00         | 6.06         | 15.83         | 0.00          | 12.06         | 0.00          |
| T / G ; 17       | CGGT <b>C</b> GCTT | 0.00        | 0.00        | 0.65         | 0.00         | 0.00          | 0.00          | 0.00          | 0.00          |
| C / A ; 18       | CGGTCT <b>A</b> TT | 0.00        | 0.00        | 1.51         | 3.66         | 2.19          | 0.00          | 0.00          | 0.00          |
| C / G ; 18       | CGGTCT <b>G</b> TT | 0.00        | 0.00        | 1.67         | 3.76         | 0.00          | 0.00          | 0.00          | 0.00          |
| C / T ; 18       | CGGTCT <b>C</b> TT | 0.00        | 1.40        | 0.00         | 0.00         | 0.00          | 0.00          | 0.00          | 0.00          |
| T / C ; 19       | CGGTCT <b>T</b> TT | 0.00        | 0.00        | 0.00         | 1.29         | 2.38          | 2.25          | 2.35          | 2.28          |

Yao et.al;Fig. S8
