# Supplementary material for: Transcriptome analysis of microRNAs in developing cerebral cortex of rat
Source: PubMed Central journal article supplement (PMC3441217; doi:10.1186/1471-2164-13-232), 2012-06-12
Supplement: 1471-2164-13-232-S9.pdf [file 1471-2164-13-232-S9.pdf]

**Table S1: Summary of reads from deep-sequencing of small RNAs**

|                         | <b>E10</b> | <b>E13</b> | <b>E17</b> | <b>P0</b> | <b>P0'</b> | <b>P3</b> | <b>P7</b> | <b>P14</b> | <b>P28</b> |
|-------------------------|------------|------------|------------|-----------|------------|-----------|-----------|------------|------------|
| <b>Total reads</b>      | 23255034   | 23136784   | 20419875   | 20403949  | 19361274   | 21853490  | 19539424  | 22437354   | 20678150   |
| <b>Clean reads</b>      | 16420636   | 12769251   | 13830486   | 14858820  | 13964298   | 13129806  | 14607976  | 15806174   | 16590379   |
| <b>Mapped to genome</b> | 12034079   | 10820400   | 11019566   | 11732561  | 10188829   | 11624211  | 12973582  | 13234099   | 10457484   |
